# Supplementary material
Source: publisher figshare collection journal article supplement (https://tandf.figshare.com/ndownloader/files/15142247)
Supplement: Supplementary file 1 [file 15142247]

## SUPPLEMENTARY MATERIAL

### Two new compounds from *Artemisia ordosica* Krasch.

Qiang Tong<sup>1</sup>, Qinghu Wang<sup>2\*</sup>, Bashenjirigala<sup>2</sup>, Bilegetu Pa<sup>2</sup>, Wenqiang Bao<sup>2</sup>, Junsheng Hao<sup>2</sup>

<sup>1</sup> *Affiliated Hospital, Inner Mongolia University for Nationalities, Tongliao 028000, Inner Mongolia, China*

<sup>2</sup> *College of Traditional Mongolian Medicine, Inner Mongolia University for Nationalities, Tongliao 028000, Inner Mongolia, China*

Two new compounds, named ordosacid A (**5**) and ordosacid B (**6**), along with four known compounds: 3,4-dihydroxybenzaldehyde (**1**), *p*-hydroxybenzoic acid (**2**), *p*-hydroxycinnamic acid (**3**) and *o*-hydroxycinnamic acid (**4**), were isolated from the EtOAc extract of *Artemisia ordosica* Krasch. The structures of new compounds were elucidated on the basis of spectroscopic methods including UV, IR, ESI-MS, 1D NMR, 2D NMR, HR-ESI-MS and modified Mosher's method.

Keywords: *Artemisia ordosica* Krasch.; Ordosacid A; Ordosacid B; NMR

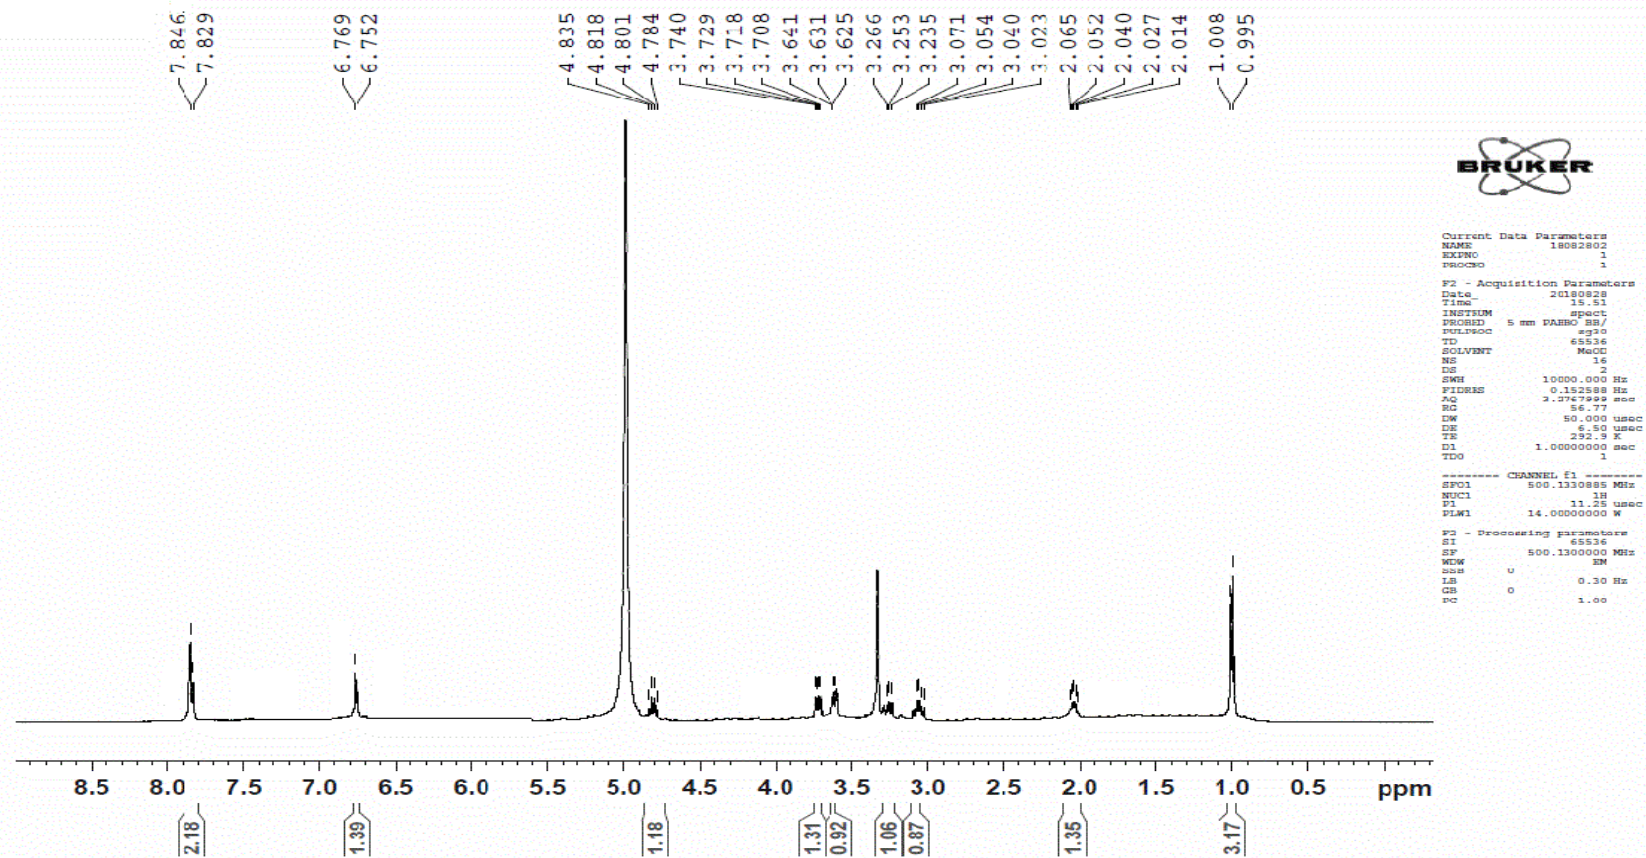

Figure S1.  $^1\text{H}$ -NMR spectrum of compound **5**

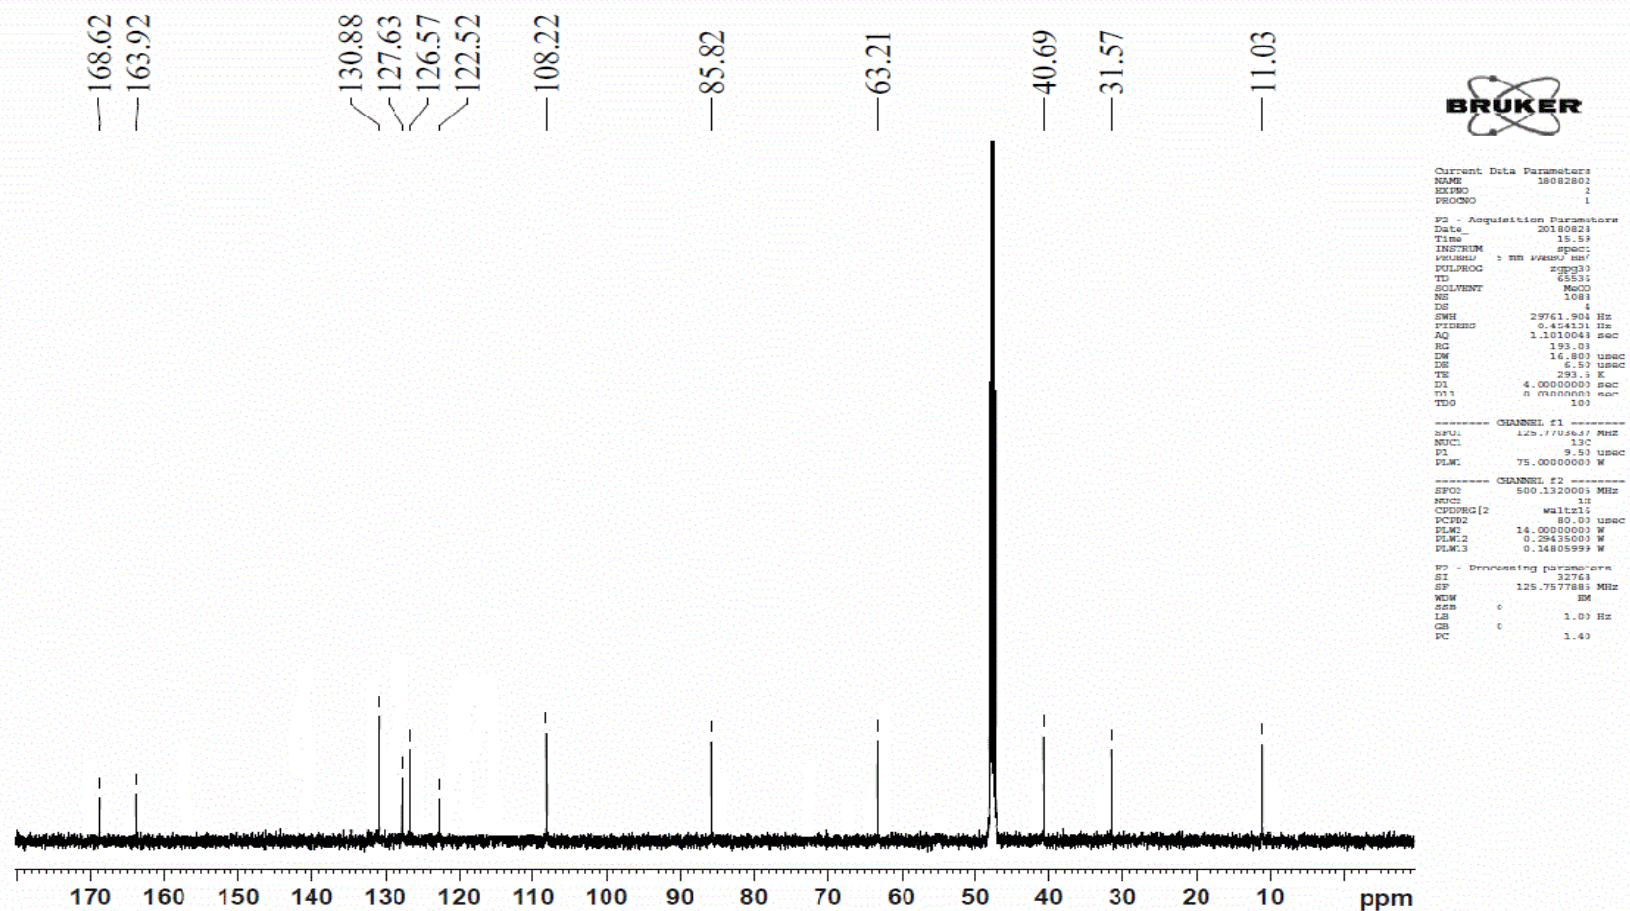

Figure S2.  $^{13}\text{C}$ -NMR spectrum of compound **5**





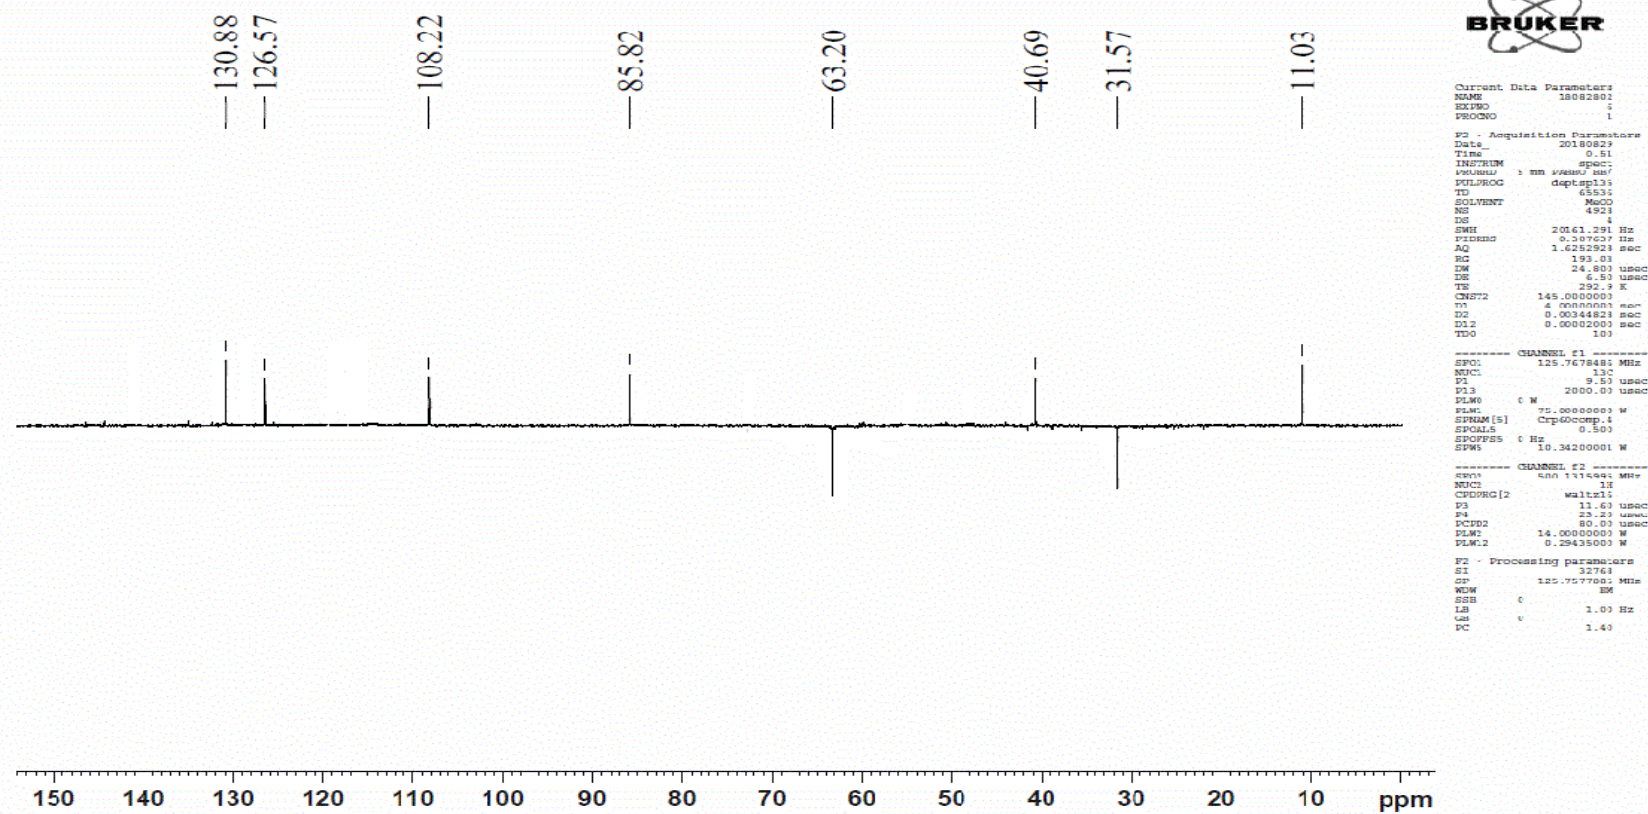

Figure S4. DEPT spectrum of compound 5

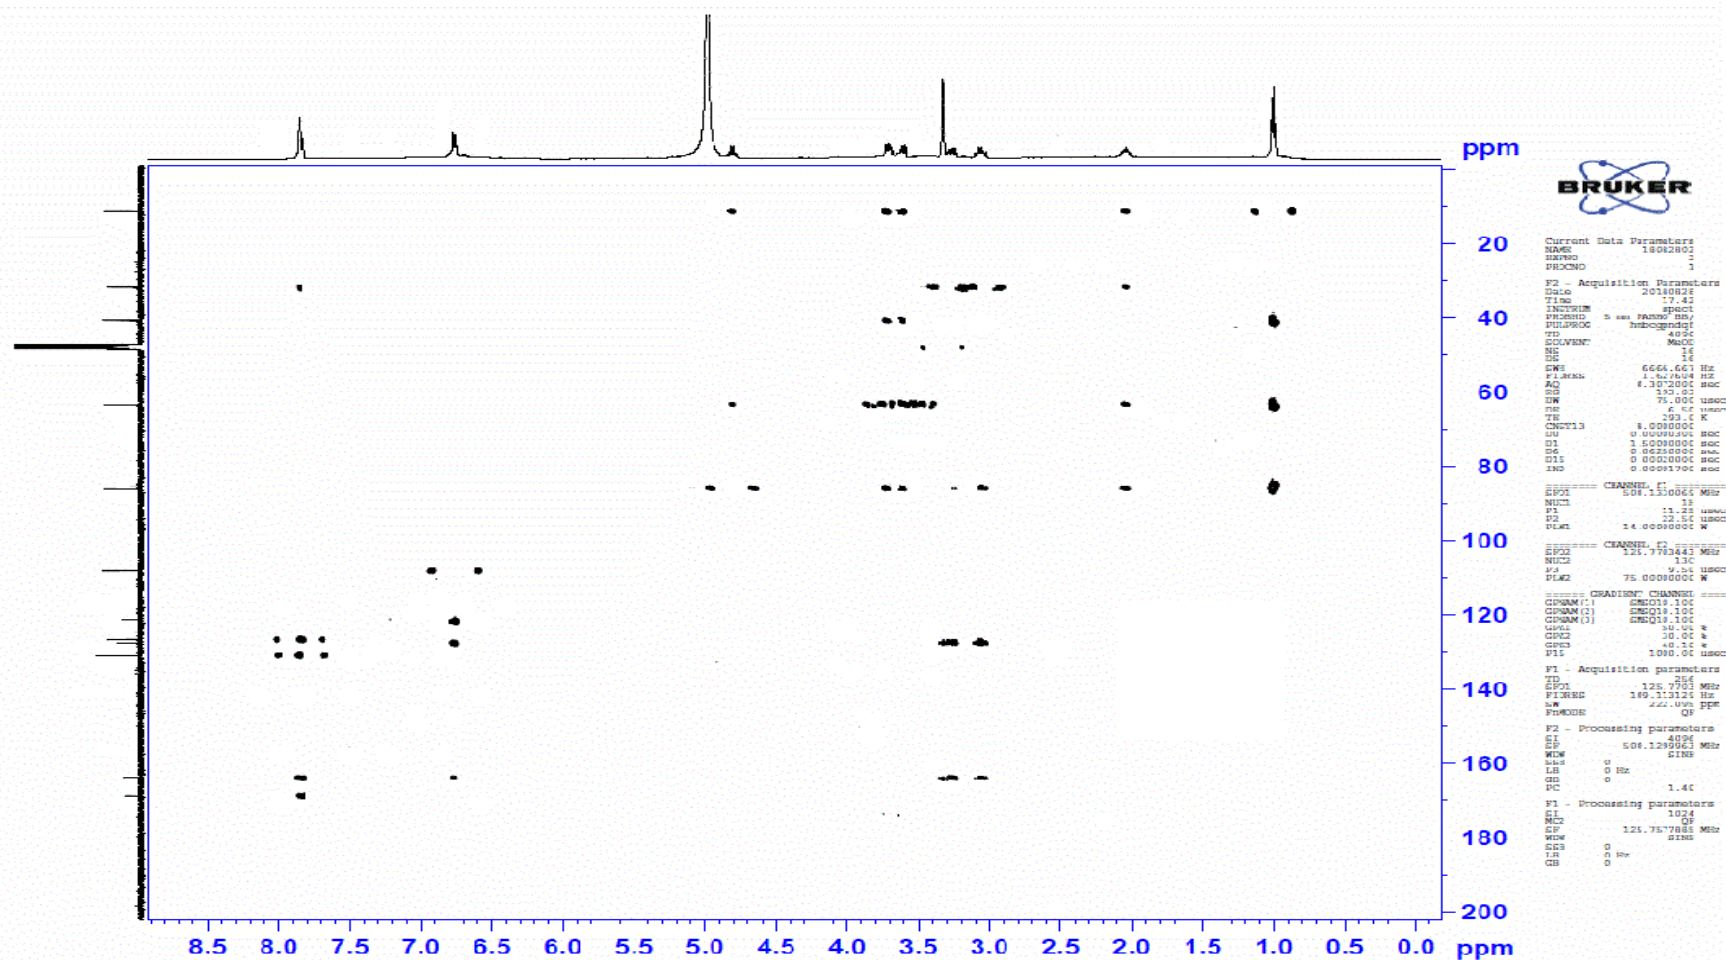

Figure S5. HMBC spectrum of compound 5

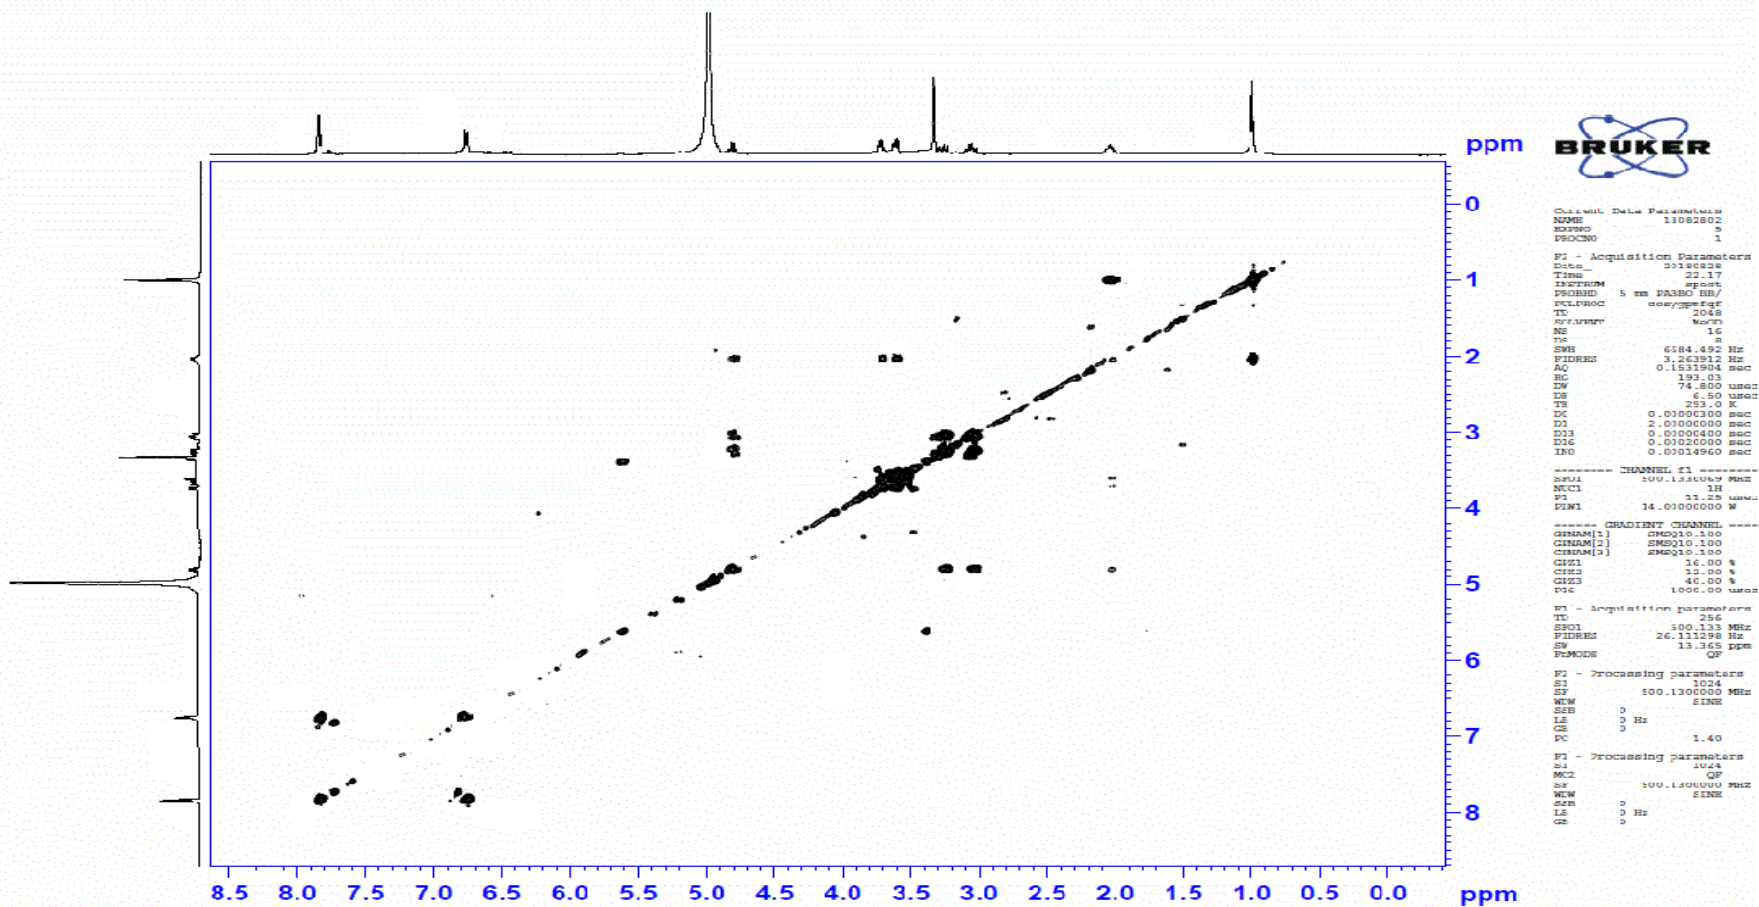

Figure S6.COSY spectrum of compound 5



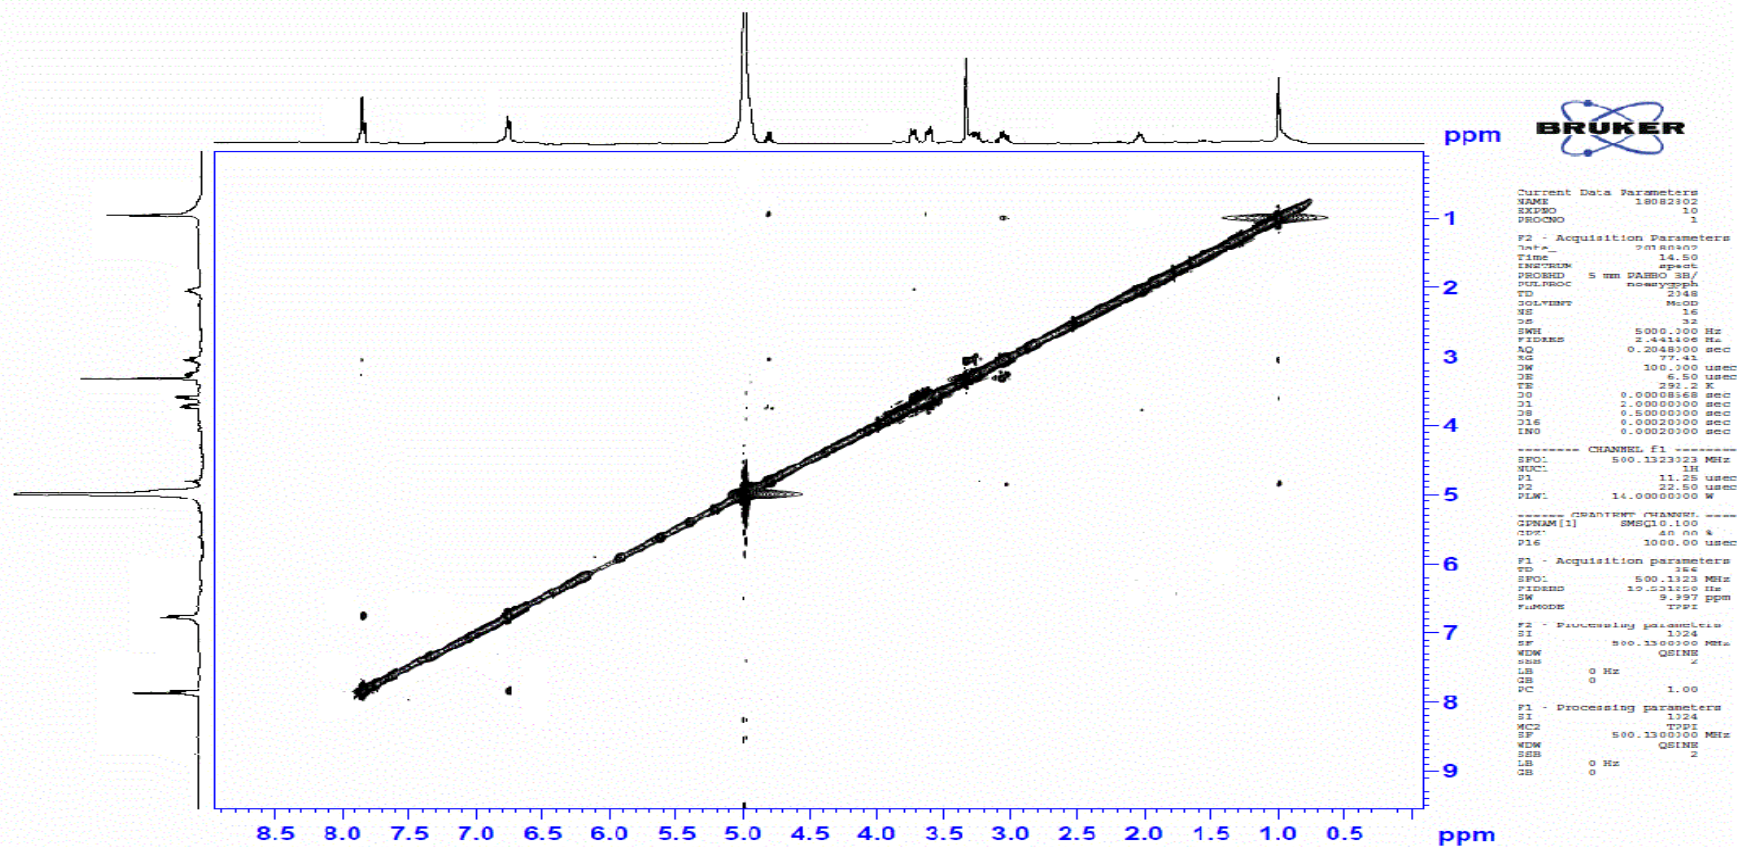

Figure S7.NOESY spectrum of compound 5



**Single Mass Analysis**

Tolerance = 100.0 mDa / DBE: min = -1.5, max = 50.0

Element prediction: Off

Monoisotopic Mass, Even Electron Ions

5 formula(e) evaluated with 1 results within limits (up to 50 closest results for each mass)

Elements Used:

C: 0-12 H: 0-20

O: 0-5

| Mass     | Calc. Mass | mDa  | PPM   | DBE | Formula    | C  | H  | O |
|----------|------------|------|-------|-----|------------|----|----|---|
| 239.0883 | 239.0919   | -3.6 | -15.1 | 5.5 | C12 H15 O5 | 12 | 15 | 5 |

NACHAO\_NEGA\_20180917 1 (0.034)  
TOF MS ES-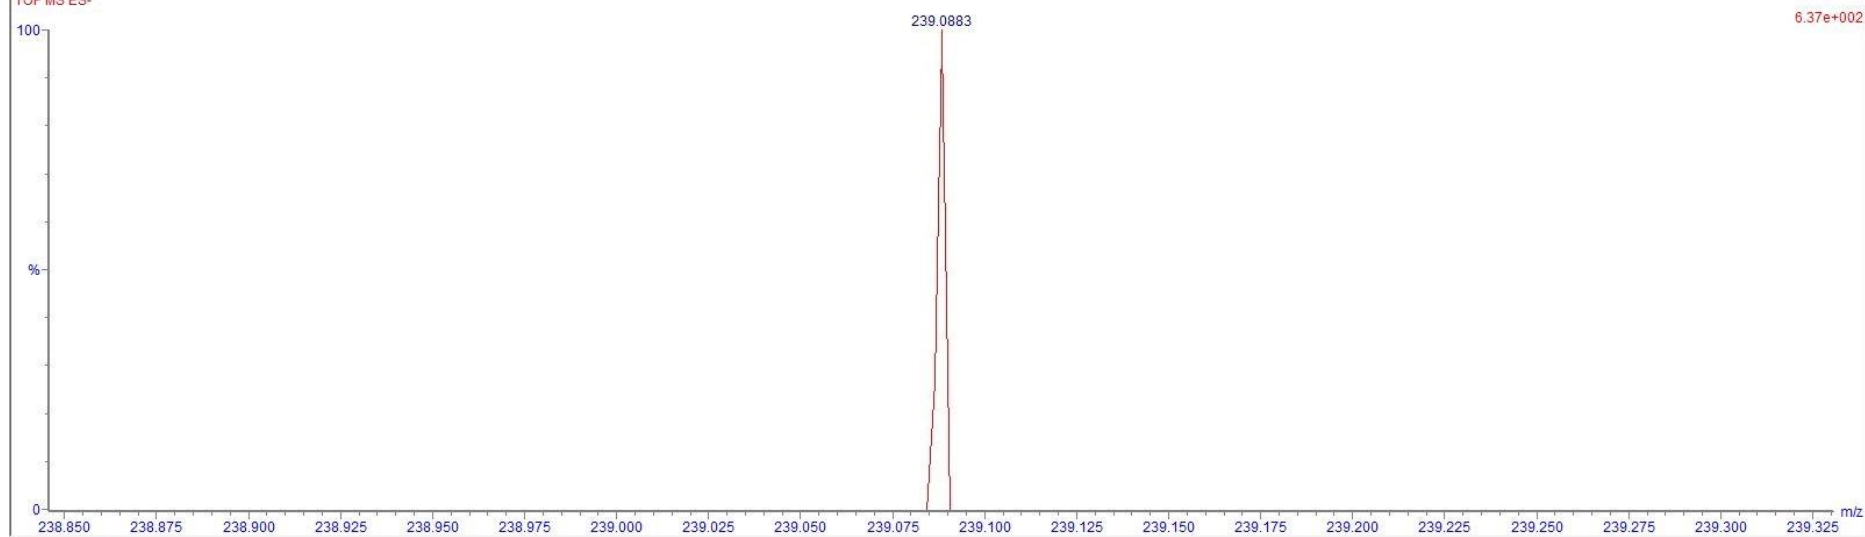

Figure S8.MS spectrum of compound 5

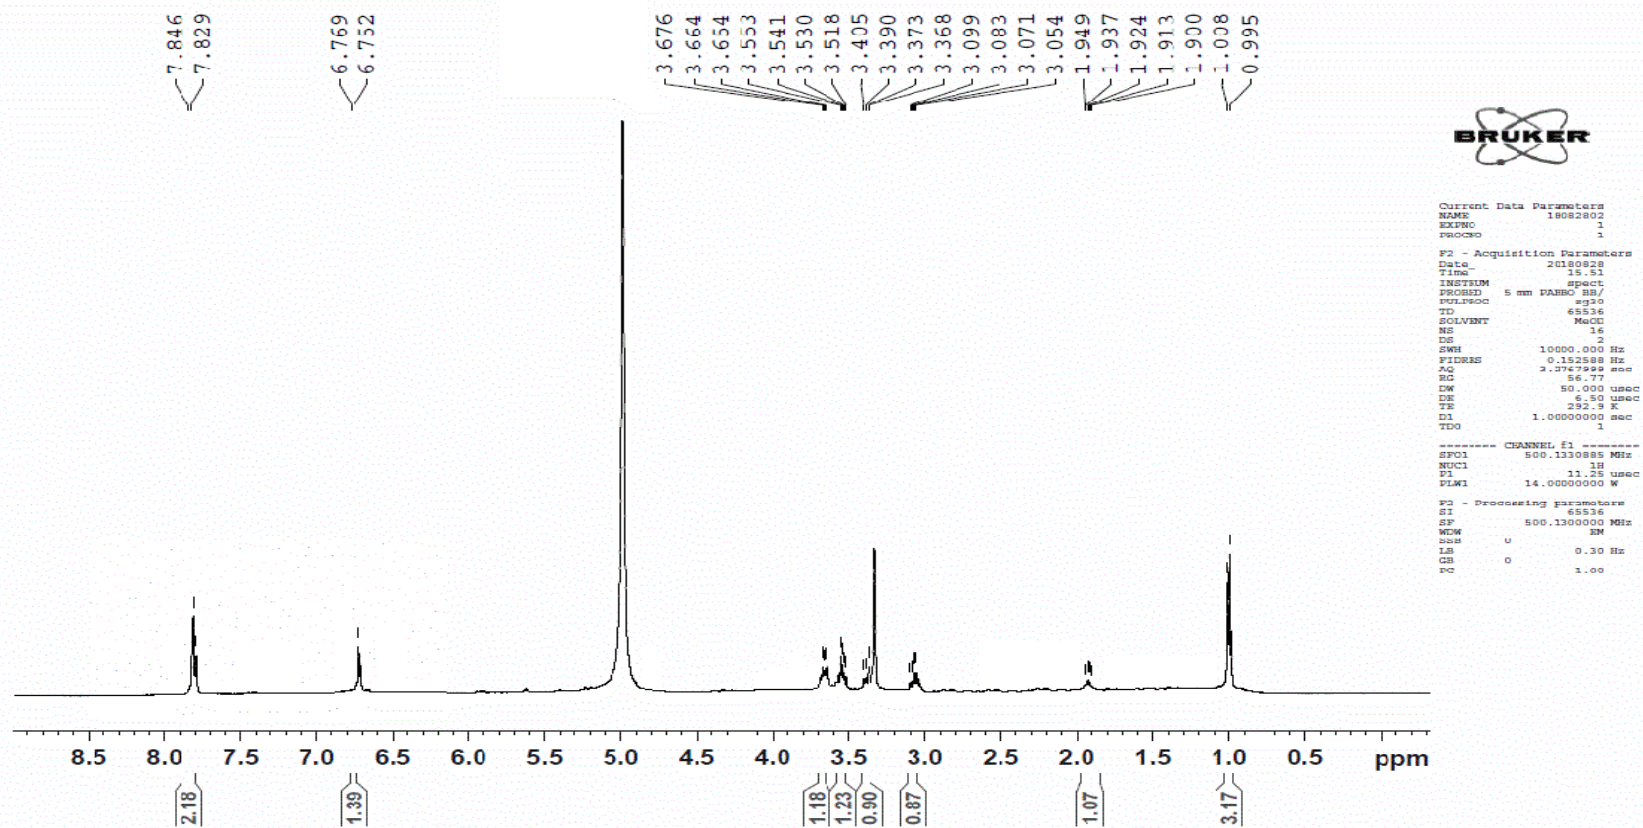

Figure S9.  $^1\text{H}$ -NMR spectrum of compound **6**

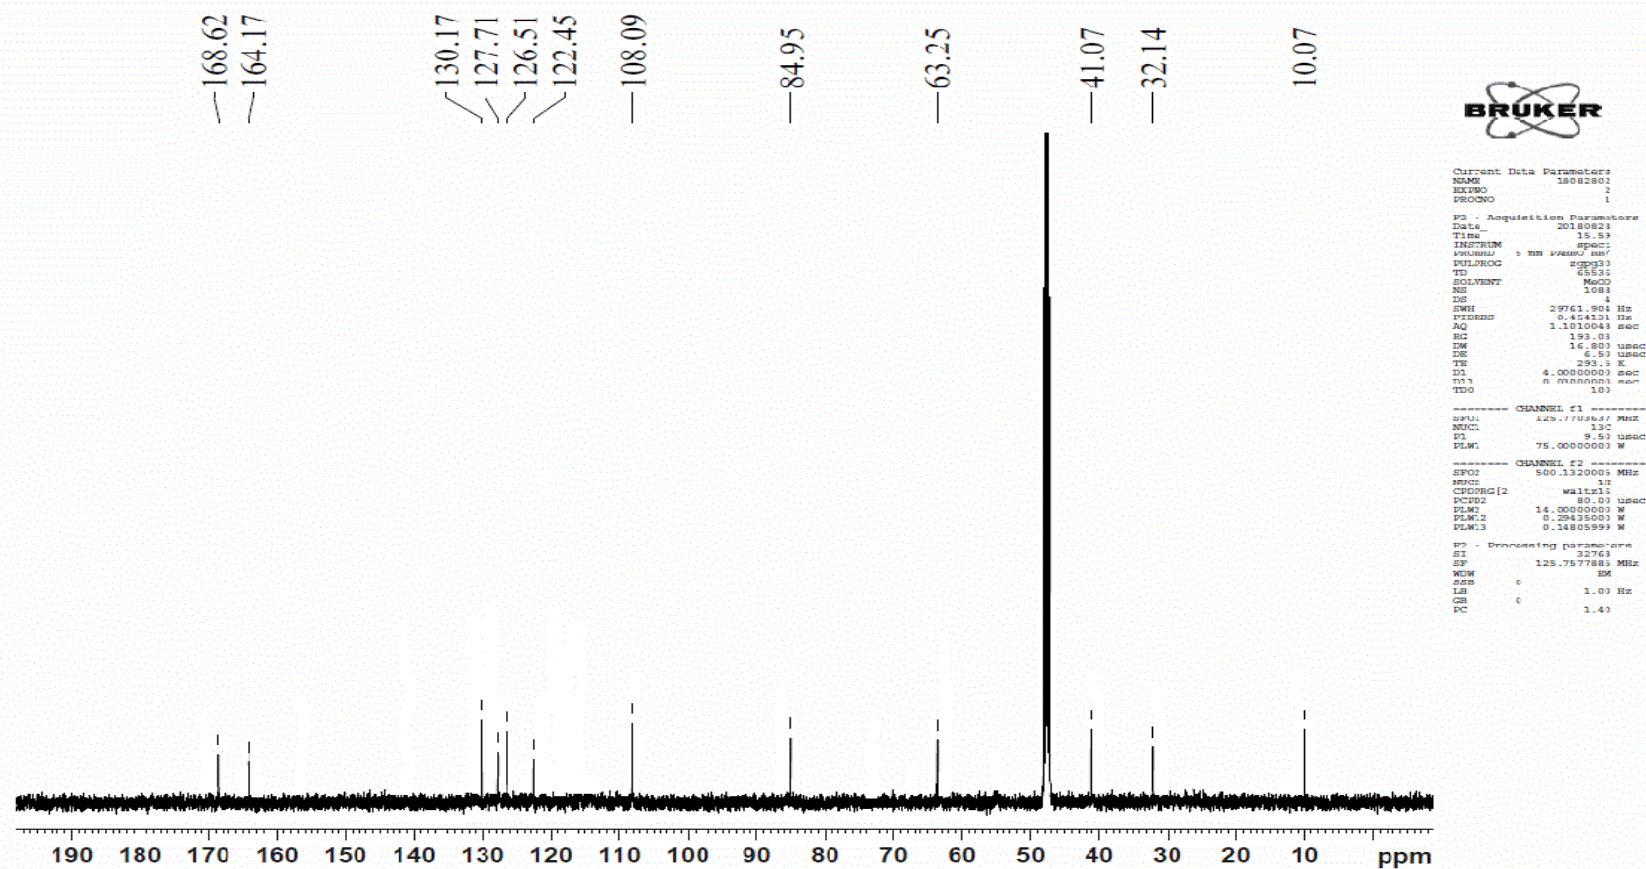

Figure S10.  $^{13}\text{C}$ -NMR spectrum of compound **6**





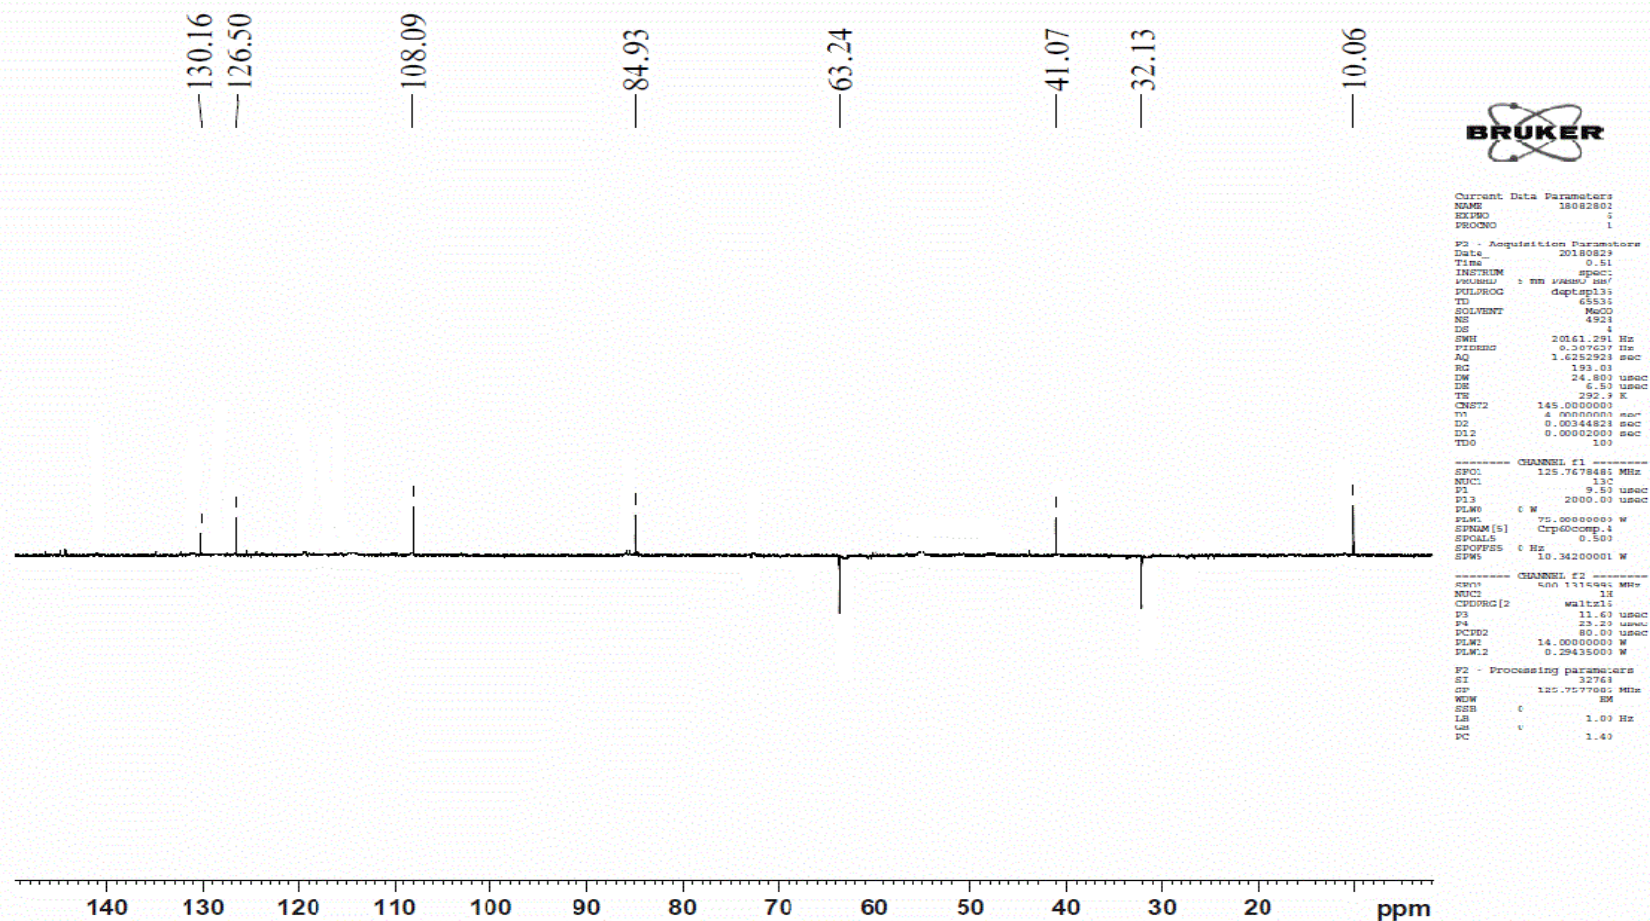

Figure S12. DEPT spectrum of compound 6

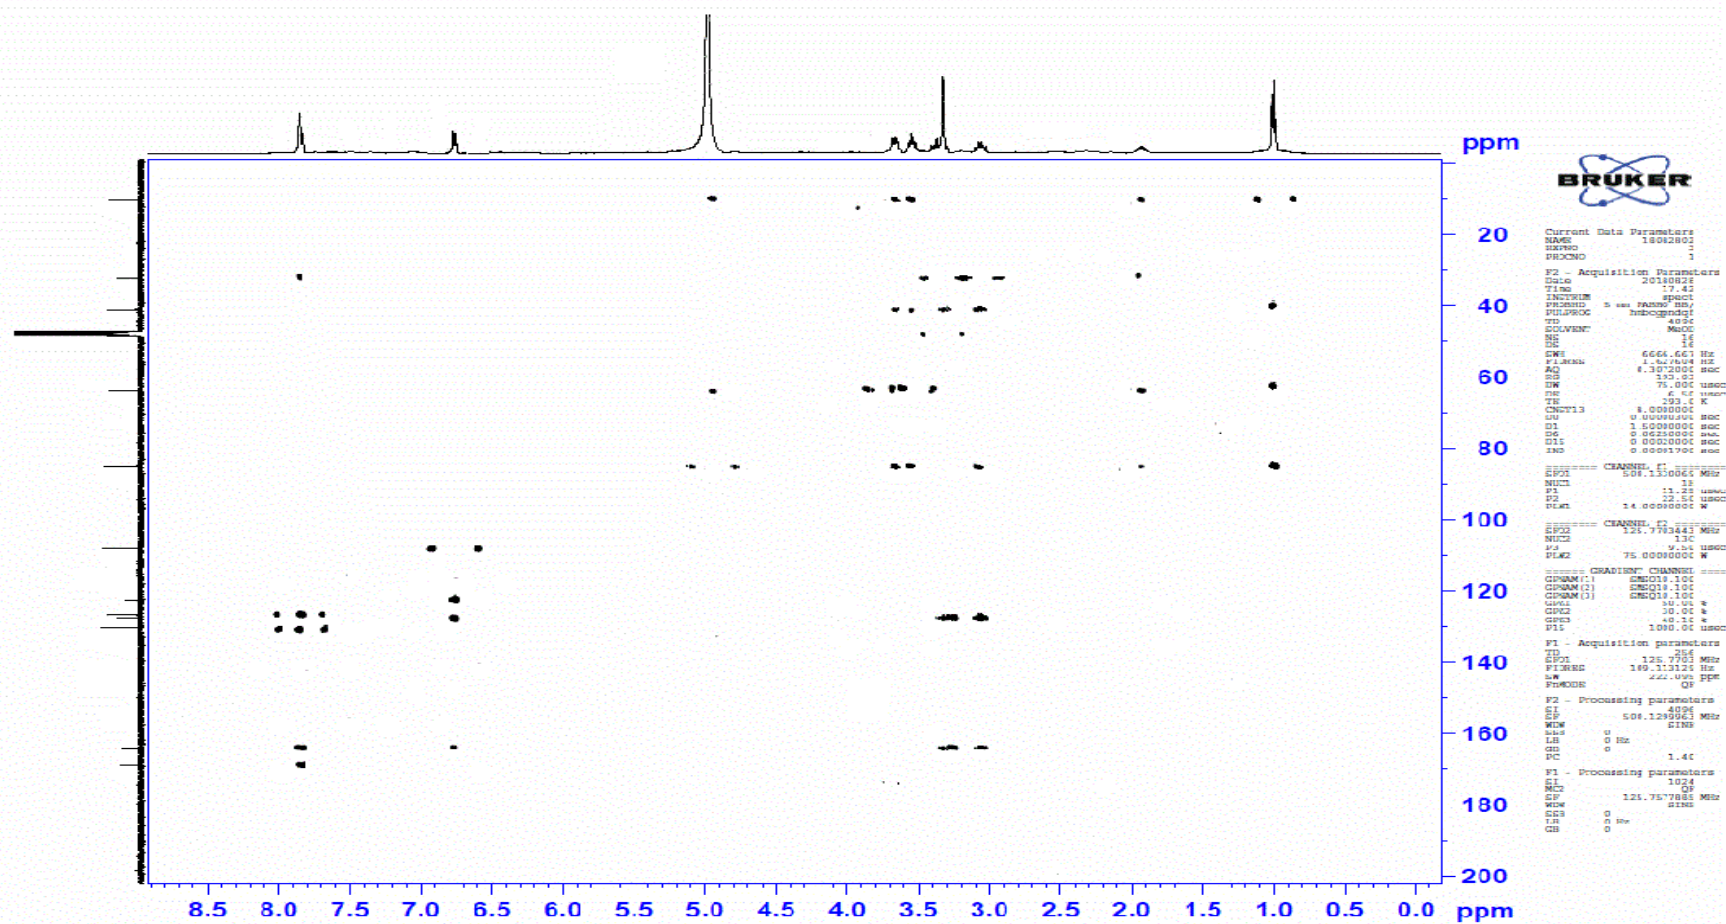

Figure S13. HMBC spectrum of compound 6

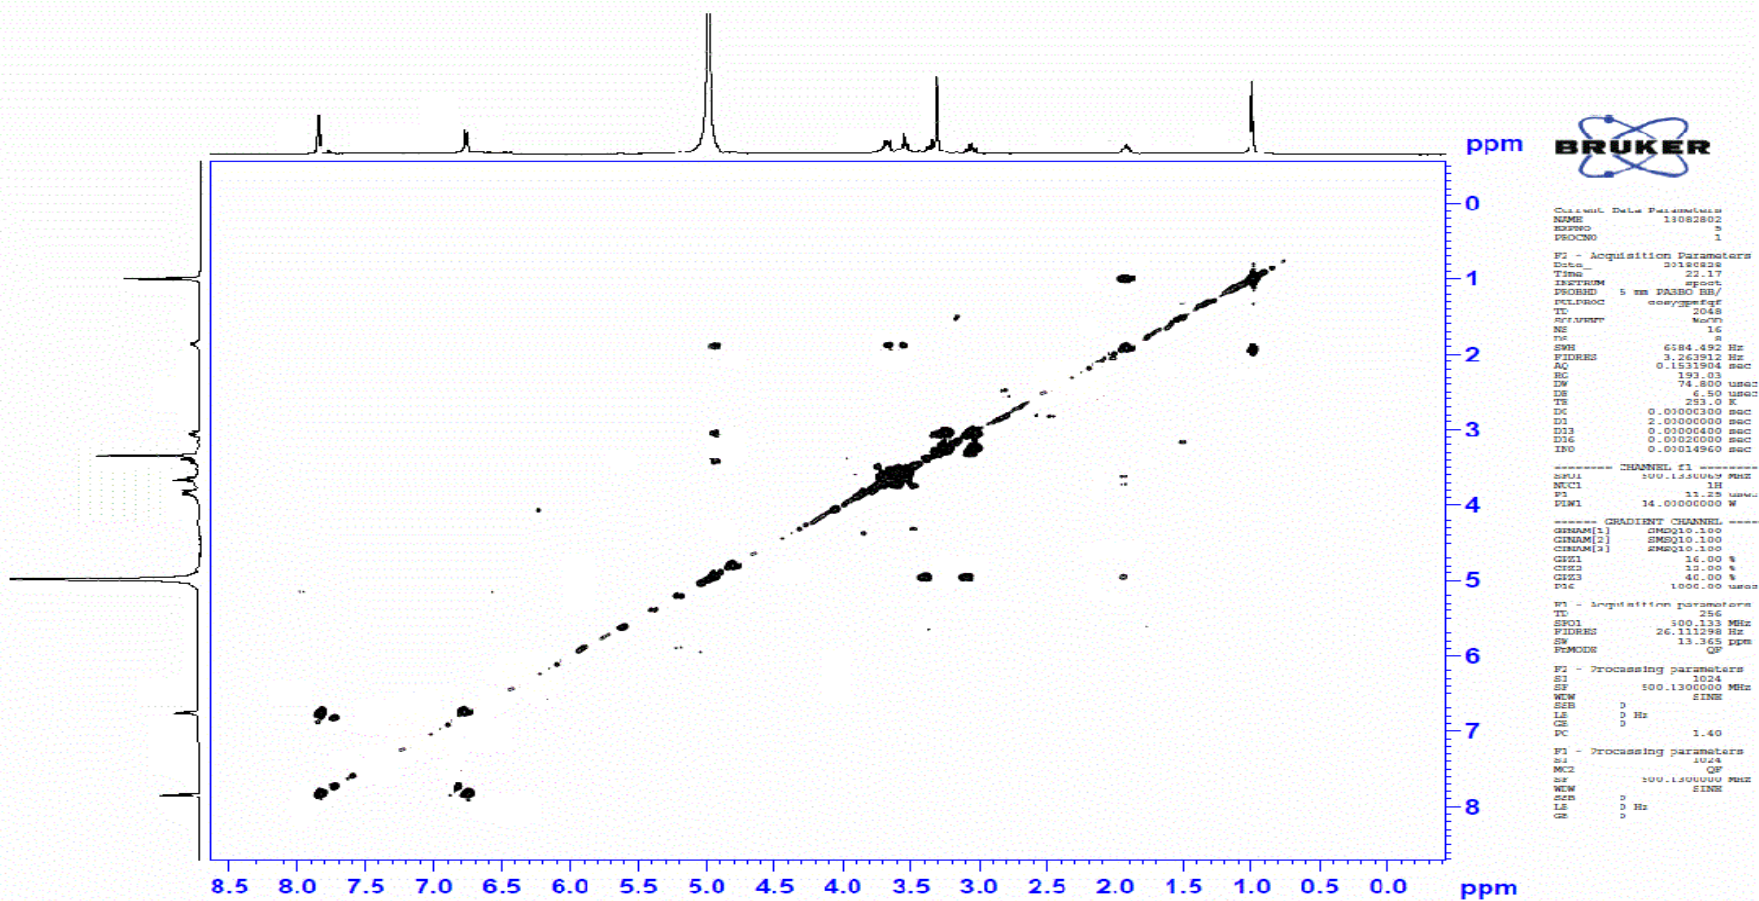

Figure S14.COSY spectrum of compound 6



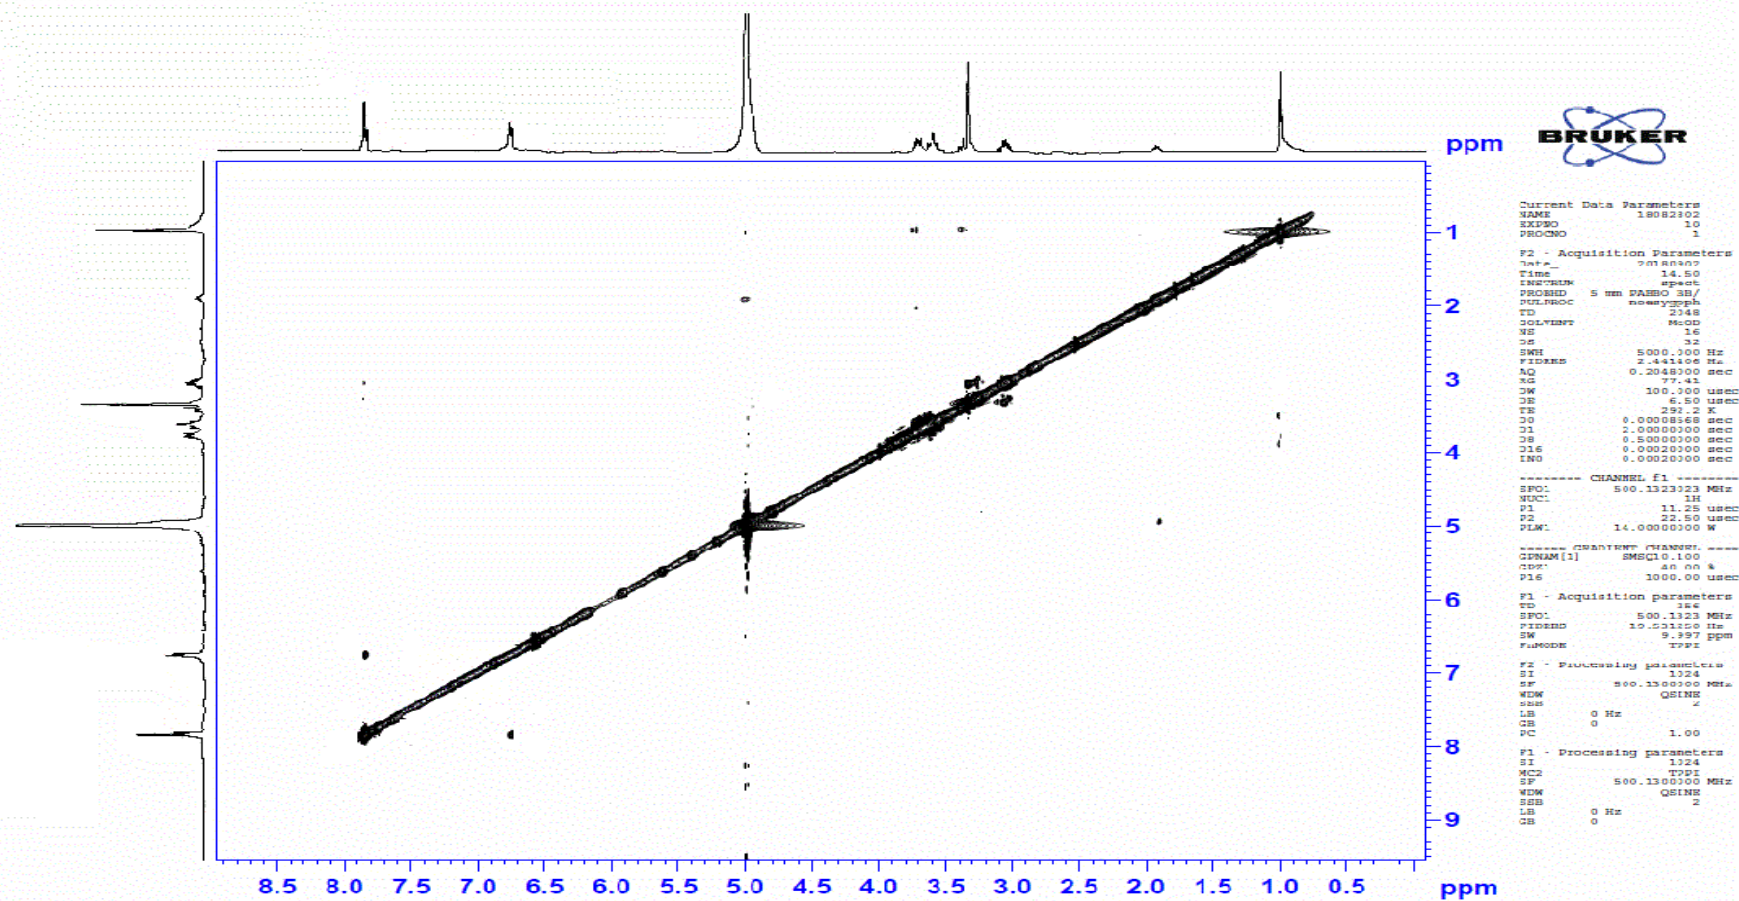

Figure S15.NOESY spectrum of compound 6



**Table S1.**  $^1\text{H}$  and  $^{13}\text{C}$ -NMR data (500 and 125 MHz, resp.;  $\text{CD}_3\text{OD}$ ) of compound **5**.

| Position | $\delta_{\text{H}}$ (ppm), $J$ (Hz)                                    | $\delta_{\text{C}}$ (ppm) | HMBC                   |
|----------|------------------------------------------------------------------------|---------------------------|------------------------|
| 1        | —                                                                      | 122.5                     |                        |
| 2        | 7.84 (brs, 1H)                                                         | 126.6                     | C-4, C-6, C-7, C-1'    |
| 3        | —                                                                      | 127.7                     |                        |
| 4        | —                                                                      | 163.9                     |                        |
| 5        | 6.75 (d, 1H, $J = 8.5$ Hz)                                             | 108.2                     | C-1, C-3               |
| 6        | 7.83 (brd, 1H, $J = 8.5$ Hz)                                           | 130.9                     | C-2, C-4, C-7          |
| 7        | —                                                                      | 168.6                     |                        |
| 1'       | 3.37 (dd, 1H, $J = 15.5, 9.0$ Hz)<br>3.04 (dd, 1H, $J = 15.5, 8.5$ Hz) | 31.6                      | C-2, C-4               |
| 2'       | 4.81 (dd, 1H, $J = 17.0, 8.5$ Hz)                                      | 85.8                      | C-3, C-5'              |
| 3'       | 2.05 (m, 1H)                                                           | 40.7                      | C-1', C-2', C-4', C-5' |
| 4'       | 3.73 (dd, 1H, $J = 11.0, 5.5$ Hz)<br>3.63 (m, 1H)                      | 63.7                      |                        |
| 5'       | 1.00 (3H, d, $J = 6.5$ Hz)                                             | 11.0                      | C-2', C-3', C-4'       |

**Table 2.**  $^1\text{H}$  and  $^{13}\text{C}$ -NMR data (500 and 125 MHz, resp.;  $\text{CD}_3\text{OD}$ ) of compound **6**.

| Position | $\delta_{\text{H}}$ (ppm), $J$ (Hz)               | $\delta_{\text{C}}$ (ppm) | HMBC                   |
|----------|---------------------------------------------------|---------------------------|------------------------|
| 1        | —                                                 | 122.4                     |                        |
| 2        | 7.84 (brs, 1H)                                    | 126.5                     | C-4, C-6, C-7, C-1'    |
| 3        | —                                                 | 127.6                     |                        |
| 4        | —                                                 | 164.2                     |                        |
| 5        | 6.76 (d, 1H, $J = 8.5$ Hz)                        | 108.1                     | C-1, C-3               |
| 6        | 7.83 (brd, 1H, $J = 8.5$ Hz)                      | 130.1                     | C-2, C-4, C-7          |
| 7        | —                                                 | 168.6                     |                        |
| 1'       | 3.33 (m, 1H)<br>3.08 (dd, 1H, $J = 14.5, 8.5$ Hz) | 32.1                      | C-2, C-4               |
| 2'       | 4.93 (m, 1H)                                      | 84.9                      | C-3, C-5'              |
| 3'       | 1.94 (m, 1H)                                      | 41.1                      | C-1', C-2', C-4', C-5' |
| 4'       | 3.67 (dd, 1H, $J = 12.0, 6.0$ Hz)<br>3.56 (m, 1H) | 63.2                      |                        |
| 5'       | 1.00 (3H, d, $J = 6.5$ Hz)                        | 10.1                      | C-2', C-3', C-4'       |
